# Supplementary material
Source: PubMed Central journal article supplement (PMC7543752)
Supplement: mmc1.pdf [file mmc1.pdf]

## **Description of supplementary materials**

### **Supplementary Tables:**

**Supplementary Table 1.** The epitope target and method of prediction in the collected studies.

**Supplementary Table 2.** B-cell epitopes curated from literature published or preprinted until June 1,2020.

**Supplementary Table 3.** T-cell epitopes curated from literature published or preprinted until June 1,2020.

Supplementary Table 1: The epitope target and method of prediction in the collected studies. “Others” include the unique methods they used to make predictions.

| Epitope target                                                               | Predicted method                                                                                           | B cell | T cell | MHC-I                         | MHC-II                     | Validation method | Allergy analysis method | Toxicity analysis method | Others                                                                                                                                                                              | reference |
|------------------------------------------------------------------------------|------------------------------------------------------------------------------------------------------------|--------|--------|-------------------------------|----------------------------|-------------------|-------------------------|--------------------------|-------------------------------------------------------------------------------------------------------------------------------------------------------------------------------------|-----------|
| Spike glycoprotein, nucleocapsid phosphoprotein , Orf1ab                     | RapidPeptidesGenerator version 1.1.0[1]f                                                                   | √      | √      |                               |                            | Blastp(1)         |                         |                          |                                                                                                                                                                                     | [2]       |
| nucleocapsid phosphoprotein                                                  |                                                                                                            |        |        | NetMHC 4.0[3] ; NetMHCpan 4.0 | NetMHC 4.0 ; NetMHCpan 4.0 |                   |                         |                          | Base on EBOV vaccine preparation experience                                                                                                                                         | [4]       |
| Spike protein                                                                | Bepipred Linear Epitope Prediction[5]                                                                      | √      | √      |                               |                            | VaxiJen v2.0      | AllerTOP v2             | ToxinPred server         |                                                                                                                                                                                     | [6]       |
| Spike glycoprotein, membrane protein, envelope protein, nucleocapsid protein | Bepipred Linear Epitope Prediction 2.0, Emini surface accessibility prediction[7], Kolaskar and Tongaonkar | √      | √      |                               |                            | VaxiJen v2.0      | Algpred[9]              |                          | For construction of novel corona vaccine, the chosen adjuvants i.e. L7/L12 ribosomal protein, beta defensin (a 45 mer peptide) and HABA protein (M. tuberculosis, accession number: | [10]      |

| Epitope target                                                          | Predicted method                                             | B cell | T cell | MHC-I                               | MHC-II                                 | Validation method         | Allergy analysis method | Toxicity analysis method | Others                                                                                                                          | reference |
|-------------------------------------------------------------------------|--------------------------------------------------------------|--------|--------|-------------------------------------|----------------------------------------|---------------------------|-------------------------|--------------------------|---------------------------------------------------------------------------------------------------------------------------------|-----------|
|                                                                         | antigenicity scale[8], ElliPro server                        |        |        |                                     |                                        |                           |                         |                          | AGV15514.1) were used                                                                                                           |           |
| Spike protein, membrane protein, envelope protein, nucleocapsid protein | RECON[11]                                                    |        | √      | RECON                               | RECON                                  | Compare with VIPR         |                         |                          |                                                                                                                                 | [12]      |
| Spike protein, Envelop protein, Membrane protein, Nucleocapsid protein  | ElliPro server, BCpred 2.0[13]                               | √      | √      |                                     | Net MHC II pan 3.2[14]                 | VaxiJen v2.0              | AllerTOP v2             |                          | To ensure high expression of the recombinant vaccine in E. coli, codon optimization and in-silico cloning were also carried out | [15]      |
| ORF1ab, Surface protein, ORF3, Envelope Protein,                        | IEDB tool “B Cell Epitope Prediction Tools”, Bepipred Linear | √      | √      | IEDBtools “MHC-I Binding Prediction | IEDB tool “MHC-II Binding Predictions” | RAMPAGE analysis tool[16] | AlgPred                 | ToxinPred server         |                                                                                                                                 | [17]      |

| Epitope target                                                          | Predicted method                   | B cell | T cell | MHC-I                                  | MHC-II                   | Validation method                   | Allergy analysis method | Toxicity analysis method | Others                                                                                                                                                                                                                                | reference |
|-------------------------------------------------------------------------|------------------------------------|--------|--------|----------------------------------------|--------------------------|-------------------------------------|-------------------------|--------------------------|---------------------------------------------------------------------------------------------------------------------------------------------------------------------------------------------------------------------------------------|-----------|
| Membrane Protein, ORF6, ORF7a, ORF7b, ORF8, Nucleocapsid Protein, ORF10 | Epitope Prediction                 |        |        | ns” and “MHC-I Processing Predictions” |                          |                                     |                         |                          |                                                                                                                                                                                                                                       |           |
| Spike protein                                                           | ElliPro server, ABCpred server[18] | √      | √      | IEDB server                            | IEDB server              |                                     |                         |                          |                                                                                                                                                                                                                                       | [19]      |
| Spike protein, Envelop protein, Membrane protein, Nucleocapsid protein  | IEDB server Bepipred 2.0           | √      | √      | Net-MHC 4.0, IEDB server               | IEDB server, RANKPEP[20] | RAMPAGE analysis tool, VaxiJen v2.0 | AllergenFP v.1.0[21]    |                          | Docking of vaccine with Toll-Like Receptors 3, 5 and 8 proved an appropriate interaction between the vaccine and receptor proteins. In silico cloning demonstrated that the vaccine can be efficiently expressed in Escherichia coli. | [22]      |
| Spike protein, nucleocapsid protein                                     | IEDB server                        |        | √      |                                        |                          |                                     |                         |                          | To identify the set of epitopes associated with MHC alleles that would                                                                                                                                                                | [23]      |

| Epitope target              | Predicted method            | B cell | T cell | MHC-I              | MHC-II            | Validation method       | Allergy analysis method | Toxicity analysis method | Others                                                                                                                                                                                                                                                                                                                               | reference |
|-----------------------------|-----------------------------|--------|--------|--------------------|-------------------|-------------------------|-------------------------|--------------------------|--------------------------------------------------------------------------------------------------------------------------------------------------------------------------------------------------------------------------------------------------------------------------------------------------------------------------------------|-----------|
|                             |                             |        |        |                    |                   |                         |                         |                          | maximize the population coverage: (i) first identified the MHC allele with the highest individual population coverage and initialized the set with their associated epitopes, then (ii) progressively added epitopes associated with other MHC alleles that resulted in the largest increase of the accumulated population coverage. |           |
| Spike glycoprotein          | ElliPro server, IEDB server | √      | √      | ProPred-1[24]      | ProPred[25]       | VaxiJen v2.0            |                         |                          |                                                                                                                                                                                                                                                                                                                                      | [26]      |
| Spike glycoprotein          | Bepipred 2.0                | √      | √      | ProPred-1          | ProPred           | VaxiJen v2.0(3)         |                         |                          |                                                                                                                                                                                                                                                                                                                                      | [27]      |
| ORF1AB, ORF3A, ORF6, ORF7A, | Discotope2[28]              | √      | √      | netMHCpan4, MARIA[ | netMHCpan4, MARIA | Validated computational |                         |                          |                                                                                                                                                                                                                                                                                                                                      | [30]      |

| Epitope target                                                                             | Predicted method                                                                            | B cell | T cell | MHC-I                | MHC-II               | Validation method                        | Allergy analysis method | Toxicity analysis method | Others                                                                | reference |
|--------------------------------------------------------------------------------------------|---------------------------------------------------------------------------------------------|--------|--------|----------------------|----------------------|------------------------------------------|-------------------------|--------------------------|-----------------------------------------------------------------------|-----------|
| ORF7B, ORF8, ORF10, Spike protein, Envelop protein, Membrane protein, Nucleocapsid protein |                                                                                             |        |        | 29]                  |                      | pipeline with SARS-CoV experimental data |                         |                          |                                                                       |           |
| Spike protein, Envelop protein, Membrane protein, Nucleocapsid protein                     | Bepired, Emini surface accessibility prediction, Kolaskar and Tongaonkar antigenicity scale | √      | √      | netMHCpan, iNeo-Pred | netMHCpan, iNeo-Pred |                                          |                         |                          | The vaccine peptides were designed by their in-house tool iNeo-Design | [31]      |
| Spike protein, Envelop protein, Membrane protein,                                          | Bepired 2.0, Discotope2                                                                     | √      | √      | NetMHCpan EL 4.0     | NetMHCpan EL 4.0     | IEDB server                              |                         |                          | Use BLAST algorithm to compare Coronavirus Sequences with SARS-CoV-2  | [32]      |

| Epitope target                                                         | Predicted method                      | B cell | T cell | MHC-I                                                                            | MHC-II                                  | Validation method | Allergy analysis method | Toxicity analysis method | Others                                                                                                                                                                            | reference |
|------------------------------------------------------------------------|---------------------------------------|--------|--------|----------------------------------------------------------------------------------|-----------------------------------------|-------------------|-------------------------|--------------------------|-----------------------------------------------------------------------------------------------------------------------------------------------------------------------------------|-----------|
| Nucleocapsid protein                                                   |                                       |        |        |                                                                                  |                                         |                   |                         |                          |                                                                                                                                                                                   |           |
| Spike protein, Envelop protein, Membrane protein                       | ElliPro(4), BepiPred, Kolaskar method | √      | √      | IEDB server, Proteasomal cleavage /TAP transport /MHC class I combined predictor | IEDB tool “MHC-II Binding Predictions ” | VaxiJen v2.0(5)   | AllerTOP v.2            |                          | Molecular docking of the chimeric vaccine peptide with the 4immune receptors (TLR3 and TLR4) predicted efficient binding                                                          | [33]      |
| Spike protein, Envelop protein, Membrane protein, Nucleocapsid protein | IEDB server                           |        | √      |                                                                                  |                                         |                   |                         |                          | Calculated the average binding affinity score for each predicted 15mer peptides against all the predominant HLA-DR types from each country/region using a sliding window approach | [34]      |

| Epitope target | Predicted method                  | B cell | T cell | MHC-I     | MHC-II       | Validation method      | Allergy analysis method                    | Toxicity analysis method | Others                                                                                                                                                                                                                                                                                                                        | reference |
|----------------|-----------------------------------|--------|--------|-----------|--------------|------------------------|--------------------------------------------|--------------------------|-------------------------------------------------------------------------------------------------------------------------------------------------------------------------------------------------------------------------------------------------------------------------------------------------------------------------------|-----------|
| Spike protein  | Ellipro                           | √      | √      |           | NetMHCII 2.2 | MolProbit y server[35] | AllergenFP 1.0 server, AllerTOP 2.0 server |                          | Human $\beta$ -defensin 2 (h $\beta$ D-2) (PDB ID: 1FD3), and sequence of GIGDPVTCLKSGAICHP VFCPRRYKQIGTCGLPG TKCKKKP, and hBD-3 (PDB ID:1KJ6) and sequence of GIINTLQKYYCRVR GGRCAVLSCLPKEEQIG KCSTRGRKCCRKK were selected as adjuvants at N and Cterminals sequence of the vaccine construct, respectively with linker EAAK | [36]      |
| Spike protein  | ABCpred server (6), DiscoTope 2.0 | √      | √      | ProPred-1 | ProPred      | VaxiJen v.2.0(7)       | AllergenFP 1.0 server, AllerTOP 2.0 server |                          | Predicted MHC I and MHC II epitopes with a VaxiJen score of >1.0 were further assessed for their binding affinity against HLA A*1101 and                                                                                                                                                                                      | [38]      |



| Epitope target                                                               | Predicted method            | B cell | T cell | MHC-I       | MHC-II       | Validation method | Allergy analysis method | Toxicity analysis method | Others                                                                                                                                                                                                      | reference |
|------------------------------------------------------------------------------|-----------------------------|--------|--------|-------------|--------------|-------------------|-------------------------|--------------------------|-------------------------------------------------------------------------------------------------------------------------------------------------------------------------------------------------------------|-----------|
|                                                                              |                             |        |        |             |              |                   |                         |                          | DRB1*0101, respectively using MHCpred version 2.0[37]                                                                                                                                                       |           |
| Spike protein, Envelop protein, Membrane protein, Nucleocapsid protein, etc. | CTLpred[39], ABCpred        | √      | √      |             |              | VaxiJen v.2.0     |                         |                          | Use miRanda[40, 41] (3.3 a version) software to identify potential host microRNA target sites in the virus genome sequence. Use psRNATarget[42] server to compare the predicted targets by the two methods. | [43]      |
| Spike protein, Envelop protein, Membrane protein                             | BepiPred 2.0, DiscoTope 2.0 | √      | √      | netMHC -4.0 | netMHCII 2.3 |                   |                         |                          | Proposed two scores for evaluating and prioritizing the safety and immunogenicity regions of the viral genome for vaccination to obtain safe T cell epitopes with immunogenicity.                           | [44]      |

| Epitope target | Predicted method                                                                                                                                                                                      | B cell | T cell | MHC-I       | MHC-II      | Validation method | Allergy analysis method | Toxicity analysis method | Others | reference |
|----------------|-------------------------------------------------------------------------------------------------------------------------------------------------------------------------------------------------------|--------|--------|-------------|-------------|-------------------|-------------------------|--------------------------|--------|-----------|
| Spike protein  | Bepipred and Bepipred2.0, Kolaskar and Tongaonkar antigenicity, Parker hydrophilicity, Chou and Fasman beta turn, Karplus and Schulz flexibility, Emini surface accessibility prediction, BcePred[45] |        |        | IEDB server | IEDB server | VaxiJen v.2.0     | Allergen FP 1.0         | ToxinPred                |        | [46]      |

1. Blastp: Parameters -word\_size 1, -gapopen 9, -gapextend 1 and -evalue 200000 were selected. Successful alignments were defined by a 100% identity and a coverage greater than 80%.
2. Using an interatomic clash-cutoff of 1.25 Å, 173 antigen poses were sampled, and each of which yielded a successful (not necessarily unique) antibody design targeted at the seven most solvent accessible ACE2-binding residues of SARS-CoV-2 Spike RBD.
3. The selected epitopes were submitted to the VaxiJen v.2.0 server applying a virus as a target field with the given threshold value of 0.4 for analyzing the antigenic propensity
4. The minimum score value set at 0.4 while the maximum distance selected as 6 Å.
5. The antigenicity of the final chimeric protein sequence was predicted by the VaxiJen 2.0 285 server to be 0.450 with a virus model at a threshold of 0.4 and 0.875 with ANTIGENpro.

6. The default threshold value of 0.51 and window length 20 was fixed for prediction.
7. The server was run with virus as a target field at a default threshold value of 0.4.
8. Energy threshold : -20 kcal/mol
9. The filtering criteria 0.5 was used.







|                                                                                                                                                                                                                                                                 |                                                             |
|-----------------------------------------------------------------------------------------------------------------------------------------------------------------------------------------------------------------------------------------------------------------|-------------------------------------------------------------|
| Rehman, H.M., et al., <i>A putative prophylactic solution for COVID-19: Development of novel multi-epitope vaccine candidate against SARS - COV -2 by comprehensive immunoinformatic and molecular modelling approach</i> . Preprints, 2020.                    | FHAIHV                                                      |
| Rehman, H.M., et al., <i>A putative prophylactic solution for COVID-19: Development of novel multi-epitope vaccine candidate against SARS - COV -2 by comprehensive immunoinformatic and molecular modelling approach</i> . Preprints, 2020.                    | NPVLPFN                                                     |
| Rehman, H.M., et al., <i>A putative prophylactic solution for COVID-19: Development of novel multi-epitope vaccine candidate against SARS - COV -2 by comprehensive immunoinformatic and molecular modelling approach</i> . Preprints, 2020.                    | QSLIVN                                                      |
| Rehman, H.M., et al., <i>A putative prophylactic solution for COVID-19: Development of novel multi-epitope vaccine candidate against SARS - COV -2 by comprehensive immunoinformatic and molecular modelling approach</i> . Preprints, 2020.                    | NVVKVCEFQ                                                   |
| Rehman, H.M., et al., <i>A putative prophylactic solution for COVID-19: Development of novel multi-epitope vaccine candidate against SARS - COV -2 by comprehensive immunoinformatic and molecular modelling approach</i> . Preprints, 2020.                    | CNDPFLGVYYH                                                 |
| Rehman, H.M., et al., <i>A putative prophylactic solution for COVID-19: Development of novel multi-epitope vaccine candidate against SARS - COV -2 by comprehensive immunoinformatic and molecular modelling approach</i> . Preprints, 2020.                    | FEVVSQP                                                     |
| Rehman, H.M., et al., <i>A putative prophylactic solution for COVID-19: Development of novel multi-epitope vaccine candidate against SARS - COV -2 by comprehensive immunoinformatic and molecular modelling approach</i> . Preprints, 2020.                    | QTLALHRSY                                                   |
| Rehman, H.M., et al., <i>A putative prophylactic solution for COVID-19: Development of novel multi-epitope vaccine candidate against SARS - COV -2 by comprehensive immunoinformatic and molecular modelling approach</i> . Preprints, 2020.                    | AAVYGYL                                                     |
| Rehman, H.M., et al., <i>A putative prophylactic solution for COVID-19: Development of novel multi-epitope vaccine candidate against SARS - COV -2 by comprehensive immunoinformatic and molecular modelling approach</i> . Preprints, 2020.                    | PRTFLK                                                      |
| Rehman, H.M., et al., <i>A putative prophylactic solution for COVID-19: Development of novel multi-epitope vaccine candidate against SARS - COV -2 by comprehensive immunoinformatic and molecular modelling approach</i> . Preprints, 2020.                    | AVDCALDP                                                    |
| Rehman, H.M., et al., <i>A putative prophylactic solution for COVID-19: Development of novel multi-epitope vaccine candidate against SARS - COV -2 by comprehensive immunoinformatic and molecular modelling approach</i> . Preprints, 2020.                    | TNLCFPG                                                     |
| Rehman, H.M., et al., <i>A putative prophylactic solution for COVID-19: Development of novel multi-epitope vaccine candidate against SARS - COV -2 by comprehensive immunoinformatic and molecular modelling approach</i> . Preprints, 2020.                    | SNCVADYSVLVNS                                               |
| Rehman, H.M., et al., <i>A putative prophylactic solution for COVID-19: Development of novel multi-epitope vaccine candidate against SARS - COV -2 by comprehensive immunoinformatic and molecular modelling approach</i> . Preprints, 2020.                    | TFKCVGVSPT                                                  |
| Rehman, H.M., et al., <i>A putative prophylactic solution for COVID-19: Development of novel multi-epitope vaccine candidate against SARS - COV -2 by comprehensive immunoinformatic and molecular modelling approach</i> . Preprints, 2020.                    | TGCVIA                                                      |
| Rehman, H.M., et al., <i>A putative prophylactic solution for COVID-19: Development of novel multi-epitope vaccine candidate against SARS - COV -2 by comprehensive immunoinformatic and molecular modelling approach</i> . Preprints, 2020.                    | CYFPQSY                                                     |
| Rehman, H.M., et al., <i>A putative prophylactic solution for COVID-19: Development of novel multi-epitope vaccine candidate against SARS - COV -2 by comprehensive immunoinformatic and molecular modelling approach</i> . Preprints, 2020.                    | YQPRVVVLSFELLHAPATVCGP                                      |
| Rehman, H.M., et al., <i>A putative prophylactic solution for COVID-19: Development of novel multi-epitope vaccine candidate against SARS - COV -2 by comprehensive immunoinformatic and molecular modelling approach</i> . Preprints, 2020.                    | FGGVSVIT                                                    |
| Rehman, H.M., et al., <i>A putative prophylactic solution for COVID-19: Development of novel multi-epitope vaccine candidate against SARS - COV -2 by comprehensive immunoinformatic and molecular modelling approach</i> . Preprints, 2020.                    | QVAVLYQDV                                                   |
| Rehman, H.M., et al., <i>A putative prophylactic solution for COVID-19: Development of novel multi-epitope vaccine candidate against SARS - COV -2 by comprehensive immunoinformatic and molecular modelling approach</i> . Preprints, 2020.                    | CTEVPVAHAD                                                  |
| Rehman, H.M., et al., <i>A putative prophylactic solution for COVID-19: Development of novel multi-epitope vaccine candidate against SARS - COV -2 by comprehensive immunoinformatic and molecular modelling approach</i> . Preprints, 2020.                    | AGCLIGA                                                     |
| Rehman, H.M., et al., <i>A putative prophylactic solution for COVID-19: Development of novel multi-epitope vaccine candidate against SARS - COV -2 by comprehensive immunoinformatic and molecular modelling approach</i> . Preprints, 2020.                    | GAGICASY                                                    |
| Rehman, H.M., et al., <i>A putative prophylactic solution for COVID-19: Development of novel multi-epitope vaccine candidate against SARS - COV -2 by comprehensive immunoinformatic and molecular modelling approach</i> . Preprints, 2020.                    | VASQSI                                                      |
| Rehman, H.M., et al., <i>A putative prophylactic solution for COVID-19: Development of novel multi-epitope vaccine candidate against SARS - COV -2 by comprehensive immunoinformatic and molecular modelling approach</i> . Preprints, 2020.                    | TTELPVS                                                     |
| Rehman, H.M., et al., <i>A putative prophylactic solution for COVID-19: Development of novel multi-epitope vaccine candidate against SARS - COV -2 by comprehensive immunoinformatic and molecular modelling approach</i> . Preprints, 2020.                    | SVDCTMY                                                     |
| Rehman, H.M., et al., <i>A putative prophylactic solution for COVID-19: Development of novel multi-epitope vaccine candidate against SARS - COV -2 by comprehensive immunoinformatic and molecular modelling approach</i> . Preprints, 2020.                    | SNLLQYGSFCTQL                                               |
| Rehman, H.M., et al., <i>A putative prophylactic solution for COVID-19: Development of novel multi-epitope vaccine candidate against SARS - COV -2 by comprehensive immunoinformatic and molecular modelling approach</i> . Preprints, 2020.                    | VFAQVKQI                                                    |
| Rehman, H.M., et al., <i>A putative prophylactic solution for COVID-19: Development of novel multi-epitope vaccine candidate against SARS - COV -2 by comprehensive immunoinformatic and molecular modelling approach</i> . Preprints, 2020.                    | SQILPD                                                      |
| Rehman, H.M., et al., <i>A putative prophylactic solution for COVID-19: Development of novel multi-epitope vaccine candidate against SARS - COV -2 by comprehensive immunoinformatic and molecular modelling approach</i> . Preprints, 2020.                    | YGDCLGD                                                     |
| Rehman, H.M., et al., <i>A putative prophylactic solution for COVID-19: Development of novel multi-epitope vaccine candidate against SARS - COV -2 by comprehensive immunoinformatic and molecular modelling approach</i> . Preprints, 2020.                    | RDLCAQ                                                      |
| Rehman, H.M., et al., <i>A putative prophylactic solution for COVID-19: Development of novel multi-epitope vaccine candidate against SARS - COV -2 by comprehensive immunoinformatic and molecular modelling approach</i> . Preprints, 2020.                    | LTVLPL                                                      |
| Rehman, H.M., et al., <i>A putative prophylactic solution for COVID-19: Development of novel multi-epitope vaccine candidate against SARS - COV -2 by comprehensive immunoinformatic and molecular modelling approach</i> . Preprints, 2020.                    | YTSALLAG                                                    |
| Rehman, H.M., et al., <i>A putative prophylactic solution for COVID-19: Development of novel multi-epitope vaccine candidate against SARS - COV -2 by comprehensive immunoinformatic and molecular modelling approach</i> . Preprints, 2020.                    | LNTLVKQL                                                    |
| Rehman, H.M., et al., <i>A putative prophylactic solution for COVID-19: Development of novel multi-epitope vaccine candidate against SARS - COV -2 by comprehensive immunoinformatic and molecular modelling approach</i> . Preprints, 2020.                    | ISSVLND                                                     |
| Rehman, H.M., et al., <i>A putative prophylactic solution for COVID-19: Development of novel multi-epitope vaccine candidate against SARS - COV -2 by comprehensive immunoinformatic and molecular modelling approach</i> . Preprints, 2020.                    | SLQTYVTQQ                                                   |
| Rehman, H.M., et al., <i>A putative prophylactic solution for COVID-19: Development of novel multi-epitope vaccine candidate against SARS - COV -2 by comprehensive immunoinformatic and molecular modelling approach</i> . Preprints, 2020.                    | SECVLQGS                                                    |
| Rehman, H.M., et al., <i>A putative prophylactic solution for COVID-19: Development of novel multi-epitope vaccine candidate against SARS - COV -2 by comprehensive immunoinformatic and molecular modelling approach</i> . Preprints, 2020.                    | PHGVVFLHVTYVPA                                              |
| Rehman, H.M., et al., <i>A putative prophylactic solution for COVID-19: Development of novel multi-epitope vaccine candidate against SARS - COV -2 by comprehensive immunoinformatic and molecular modelling approach</i> . Preprints, 2020.                    | PAICHDG                                                     |
| Rehman, H.M., et al., <i>A putative prophylactic solution for COVID-19: Development of novel multi-epitope vaccine candidate against SARS - COV -2 by comprehensive immunoinformatic and molecular modelling approach</i> . Preprints, 2020.                    | SGNCDVIGI                                                   |
| Rehman, H.M., et al., <i>A putative prophylactic solution for COVID-19: Development of novel multi-epitope vaccine candidate against SARS - COV -2 by comprehensive immunoinformatic and molecular modelling approach</i> . Preprints, 2020.                    | ASVUNI                                                      |
| Sardar, R., et al., <i>Comparative analyses of SAR-CoV2 genomes from different geographical locations and other coronavirus family genomes-2: reveals unique features potentially consequential to host-virus interaction and pathogenesis</i> . bioRxiv, 2020. | IAGLIAVMVTIMLCCMTSCCSCLKGCSSGSCSKF                          |
| Siwastava, S., et al., <i>Structural basis to design multi-epitope vaccines against Novel Coronavirus 19 (COVID19) infection, the ongoing pandemic emergency: an in silico approach</i> . bioRxiv, 2020.                                                        | AGTTSGWTFGAGAAL                                             |
| Siwastava, S., et al., <i>Structural basis to design multi-epitope vaccines against Novel Coronavirus 19 (COVID19) infection, the ongoing pandemic emergency: an in silico approach</i> . bioRxiv, 2020.                                                        | TPGDSSSGOWTA                                                |
| Siwastava, S., et al., <i>Structural basis to design multi-epitope vaccines against Novel Coronavirus 19 (COVID19) infection, the ongoing pandemic emergency: an in silico approach</i> . bioRxiv, 2020.                                                        | FPNITLPCFGEVFNATRFASVYAWNRKRNSCVNA                          |
| Siwastava, S., et al., <i>Structural basis to design multi-epitope vaccines against Novel Coronavirus 19 (COVID19) infection, the ongoing pandemic emergency: an in silico approach</i> . bioRxiv, 2020.                                                        | NLDSKVGGINLYLRLFRKSNLKPFRDSTIEYQAGSTPCNGVEGFNCFYPLQSYGFPQFN |
| Yamarkovich, M., et al., <i>A SARS-CoV-2 Vaccination Strategy Focused on Population-Scale Immunity</i> . Cell Reports Medicine, 2020.                                                                                                                           | KVCEFCQNDPLFGVYYHKNNKSWMESFERVY                             |
| Yamarkovich, M., et al., <i>A SARS-CoV-2 Vaccination Strategy Focused on Population-Scale Immunity</i> . Cell Reports Medicine, 2020.                                                                                                                           | GDSSSGWTAGAAAYGYLQPRFLKYNENGT                               |
| Yamarkovich, M., et al., <i>A SARS-CoV-2 Vaccination Strategy Focused on Population-Scale Immunity</i> . Cell Reports Medicine, 2020.                                                                                                                           | KPFRDSTIEYQAGSTPCNGVEGFNCFYPLQGS                            |
| Yamarkovich, M., et al., <i>A SARS-CoV-2 Vaccination Strategy Focused on Population-Scale Immunity</i> . Cell Reports Medicine, 2020.                                                                                                                           | VGGNYNLYLFRKSNLKPFRDSTIEYQAGS                               |
| Yazdani, Z., et al., <i>Design an efficient multi-epitope peptide vaccine candidate against SARS-CoV-2: An in silico analysis</i> . bioRxiv, 2020.                                                                                                              | QCVNLTRTQLPAYTNSFRGYYPPDKVF                                 |
| Yazdani, Z., et al., <i>Design an efficient multi-epitope peptide vaccine candidate against SARS-CoV-2: An in silico analysis</i> . bioRxiv, 2020.                                                                                                              | KIADYNYLPPDDFTGCVIAWNSNNLDSKVG                              |
| Yazdani, Z., et al., <i>Design an efficient multi-epitope peptide vaccine candidate against SARS-CoV-2: An in silico analysis</i> . bioRxiv, 2020.                                                                                                              | YQPRVVVLSFELLHAPATVCGPKKSTNLV                               |
| Vishi, Y., V. Jagriti, and S. Kumar., <i>Understanding the B and T cells epitopes of spike protein of severe respiratory syndrome coronal virus-2: A computational way to predict the immunogens</i> . bioRxiv, 2020.                                           | RTLQPLPAYTNSFRGYYV                                          |
| Vishi, Y., V. Jagriti, and S. Kumar., <i>Understanding the B and T cells epitopes of spike protein of severe respiratory syndrome coronal virus-2: A computational way to predict the immunogens</i> . bioRxiv, 2020.                                           | HVSGTNGTKRFDN                                               |





**Supplementary Table 3. T-cell epitopes curated from literature published or preprinted until June 1,2020**

| Author                                                                                                                                                                                                      | Sequence                                    |
|-------------------------------------------------------------------------------------------------------------------------------------------------------------------------------------------------------------|---------------------------------------------|
| Ahmed, S.F., A.A. Quadeer, and M.R. McKay, Preliminary identification of potential vaccine targets for the COVID-19 coronavirus (SARS-CoV-2) based on SARSCoV immunological studies. <i>Viruses</i> , 2020. | GAALQIPFAMQMAYRF                            |
| Ahmed, S.F., A.A. Quadeer, and M.R. McKay, Preliminary identification of potential vaccine targets for the COVID-19 coronavirus (SARS-CoV-2) based on SARSCoV immunological studies. <i>Viruses</i> , 2020. | MAYRFNGIGVTQNVLY                            |
| Ahmed, S.F., A.A. Quadeer, and M.R. McKay, Preliminary identification of potential vaccine targets for the COVID-19 coronavirus (SARS-CoV-2) based on SARSCoV immunological studies. <i>Viruses</i> , 2020. | QLIRAAEIRASANLAATK                          |
| Ahmed, S.F., A.A. Quadeer, and M.R. McKay, Preliminary identification of potential vaccine targets for the COVID-19 coronavirus (SARS-CoV-2) based on SARSCoV immunological studies. <i>Viruses</i> , 2020. | FIAGLIAIV                                   |
| Ahmed, S.F., A.A. Quadeer, and M.R. McKay, Preliminary identification of potential vaccine targets for the COVID-19 coronavirus (SARS-CoV-2) based on SARSCoV immunological studies. <i>Viruses</i> , 2020. | ALNTLVKQL                                   |
| Ahmed, S.F., A.A. Quadeer, and M.R. McKay, Preliminary identification of potential vaccine targets for the COVID-19 coronavirus (SARS-CoV-2) based on SARSCoV immunological studies. <i>Viruses</i> , 2020. | LITGRLQSL                                   |
| Ahmed, S.F., A.A. Quadeer, and M.R. McKay, Preliminary identification of potential vaccine targets for the COVID-19 coronavirus (SARS-CoV-2) based on SARSCoV immunological studies. <i>Viruses</i> , 2020. | NLNESLIDL                                   |
| Ahmed, S.F., A.A. Quadeer, and M.R. McKay, Preliminary identification of potential vaccine targets for the COVID-19 coronavirus (SARS-CoV-2) based on SARSCoV immunological studies. <i>Viruses</i> , 2020. | QALNTLVKQLSSNFGAI                           |
| Ahmed, S.F., A.A. Quadeer, and M.R. McKay, Preliminary identification of potential vaccine targets for the COVID-19 coronavirus (SARS-CoV-2) based on SARSCoV immunological studies. <i>Viruses</i> , 2020. | RLNEVAKNL                                   |
| Ahmed, S.F., A.A. Quadeer, and M.R. McKay, Preliminary identification of potential vaccine targets for the COVID-19 coronavirus (SARS-CoV-2) based on SARSCoV immunological studies. <i>Viruses</i> , 2020. | VLNDILSRL                                   |
| Ahmed, S.F., A.A. Quadeer, and M.R. McKay, Preliminary identification of potential vaccine targets for the COVID-19 coronavirus (SARS-CoV-2) based on SARSCoV immunological studies. <i>Viruses</i> , 2020. | VVFLHVTTYV                                  |
| Blanco-Míguez, A., <i>Release of potential pro-inflammatory peptides from SARS-CoV-2 spike glycoproteins in neutrophil-extracellular traps. bioRxiv.</i>                                                    | YFASTEKSNIIRGWIFGTTLDSTKQSLLIIV             |
| Blanco-Míguez, A., <i>Release of potential pro-inflammatory peptides from SARS-CoV-2 spike glycoproteins in neutrophil-extracellular traps. bioRxiv.</i>                                                    | STEKSNIIRGWIFGTTLDSTKQSLLIIV                |
| Blanco-Míguez, A., <i>Release of potential pro-inflammatory peptides from SARS-CoV-2 spike glycoproteins in neutrophil-extracellular traps. bioRxiv.</i>                                                    | STEKSNIIRGWIFGTTLDSTKQSLLIIVNNA             |
| Blanco-Míguez, A., <i>Release of potential pro-inflammatory peptides from SARS-CoV-2 spike glycoproteins in neutrophil-extracellular traps. bioRxiv.</i>                                                    | SQPFLMDLEGKQGNFKNLREFVFKN\IDGYFKIYSKHTPINLV |
| Blanco-Míguez, A., <i>Release of potential pro-inflammatory peptides from SARS-CoV-2 spike glycoproteins in neutrophil-extracellular traps. bioRxiv.</i>                                                    | DLPIGINITRFQTLALHRSYLTGPDSSSGWTA            |
| Blanco-Míguez, A., <i>Release of potential pro-inflammatory peptides from SARS-CoV-2 spike glycoproteins in neutrophil-extracellular traps. bioRxiv.</i>                                                    | LDPLSETKCTLSFTVEKGIYQTSNFRV                 |
| Blanco-Míguez, A., <i>Release of potential pro-inflammatory peptides from SARS-CoV-2 spike glycoproteins in neutrophil-extracellular traps. bioRxiv.</i>                                                    | WNSNNLDSKVGGNYNYLYRFLFRKSNLKPFERDISTEIQQA   |
| Blanco-Míguez, A., <i>Release of potential pro-inflammatory peptides from SARS-CoV-2 spike glycoproteins in neutrophil-extracellular traps. bioRxiv.</i>                                                    | GGNYNYLYRFLFRKSNLKPFERDISTEIQAGSTPCNGV      |
| Blanco-Míguez, A., <i>Release of potential pro-inflammatory peptides from SARS-CoV-2 spike glycoproteins in neutrophil-extracellular traps. bioRxiv.</i>                                                    | DCTMYICGDSTECSNLLLQYGSFCTQLNRALTGIA         |
| Behbahani, M., <i>In silico Design of novel Multi-epitope recombinant Vaccine based on Coronavirus surface glycoprotein. bioRxiv, 2020.</i>                                                                 | KLNDLCFTN                                   |
| Behbahani, M., <i>In silico Design of novel Multi-epitope recombinant Vaccine based on Coronavirus surface glycoprotein. bioRxiv, 2020.</i>                                                                 | KLNDLCFTNV                                  |
| Behbahani, M., <i>In silico Design of novel Multi-epitope recombinant Vaccine based on Coronavirus surface glycoprotein. bioRxiv, 2020.</i>                                                                 | KLNDLCFTNVY                                 |
| Behbahani, M., <i>In silico Design of novel Multi-epitope recombinant Vaccine based on Coronavirus surface glycoprotein. bioRxiv, 2020.</i>                                                                 | PTKLNLCFTN                                  |
| Behbahani, M., <i>In silico Design of novel Multi-epitope recombinant Vaccine based on Coronavirus surface glycoprotein. bioRxiv, 2020.</i>                                                                 | SPTKLNLCFTN                                 |
| Behbahani, M., <i>In silico Design of novel Multi-epitope recombinant Vaccine based on Coronavirus surface glycoprotein. bioRxiv, 2020.</i>                                                                 | VSPKLNLCFTN                                 |
| Behbahani, M., <i>In silico Design of novel Multi-epitope recombinant Vaccine based on Coronavirus surface glycoprotein. bioRxiv, 2020.</i>                                                                 | KLNDLCFTNVYA                                |
| Behbahani, M., <i>In silico Design of novel Multi-epitope recombinant Vaccine based on Coronavirus surface glycoprotein. bioRxiv, 2020.</i>                                                                 | KLNDLCFTNVYAD                               |
| Behbahani, M., <i>In silico Design of novel Multi-epitope recombinant Vaccine based on Coronavirus surface glycoprotein. bioRxiv, 2020.</i>                                                                 | LNDLCFTNV                                   |

|                                                                                                                                                                                             |                         |
|---------------------------------------------------------------------------------------------------------------------------------------------------------------------------------------------|-------------------------|
| Behbahani, M., In silico Design of novel Multi-epitope recombinant Vaccine based on Coronavirus surface glycoprotein. bioRxiv, 2020.                                                        | GVSPKLNLDLCLFTN         |
| Behbahani, M., In silico Design of novel Multi-epitope recombinant Vaccine based on Coronavirus surface glycoprotein. bioRxiv, 2020.                                                        | YGVSPKLNLDLCLFTN        |
| Behbahani, M., In silico Design of novel Multi-epitope recombinant Vaccine based on Coronavirus surface glycoprotein. bioRxiv, 2020.                                                        | CYGVSPKLNLDLCLFTN       |
| Behbahani, M., In silico Design of novel Multi-epitope recombinant Vaccine based on Coronavirus surface glycoprotein. bioRxiv, 2020.                                                        | CVNLTTRTQ               |
| Behbahani, M., In silico Design of novel Multi-epitope recombinant Vaccine based on Coronavirus surface glycoprotein. bioRxiv, 2020.                                                        | QCVNLTTRTQ              |
| Behbahani, M., In silico Design of novel Multi-epitope recombinant Vaccine based on Coronavirus surface glycoprotein. bioRxiv, 2020.                                                        | LDITPCSFSGVSV           |
| Behbahani, M., In silico Design of novel Multi-epitope recombinant Vaccine based on Coronavirus surface glycoprotein. bioRxiv, 2020.                                                        | LDITPCSFSGVSVI          |
| Behbahani, M., In silico Design of novel Multi-epitope recombinant Vaccine based on Coronavirus surface glycoprotein. bioRxiv, 2020.                                                        | VKNKCVNFN               |
| Bhattacharya, M., et al., <i>Development of epitope-based peptide vaccine against novel coronavirus 2019 (SARS-COV-2): Immunoinformatics approach.</i> J Med Virol, 2020.                   | SQCVNLTR                |
| Bhattacharya, M., et al., <i>Development of epitope-based peptide vaccine against novel coronavirus 2019 (SARS-COV-2): Immunoinformatics approach.</i> J Med Virol, 2020.                   | GVYYHKNNK               |
| Bhattacharya, M., et al., <i>Development of epitope-based peptide vaccine against novel coronavirus 2019 (SARS-COV-2): Immunoinformatics approach.</i> J Med Virol, 2020.                   | GKQGNFKNL               |
| Bhattacharya, M., et al., <i>Development of epitope-based peptide vaccine against novel coronavirus 2019 (SARS-COV-2): Immunoinformatics approach.</i> J Med Virol, 2020.                   | GIYQTSNFR               |
| Bhattacharya, M., et al., <i>Development of epitope-based peptide vaccine against novel coronavirus 2019 (SARS-COV-2): Immunoinformatics approach.</i> J Med Virol, 2020.                   | VSPTKLNLDL              |
| Bhattacharya, M., et al., <i>Development of epitope-based peptide vaccine against novel coronavirus 2019 (SARS-COV-2): Immunoinformatics approach.</i> J Med Virol, 2020.                   | KIADYNYKL               |
| Bhattacharya, M., et al., <i>Development of epitope-based peptide vaccine against novel coronavirus 2019 (SARS-COV-2): Immunoinformatics approach.</i> J Med Virol, 2020.                   | KVGGNYNYL               |
| Bhattacharya, M., et al., <i>Development of epitope-based peptide vaccine against novel coronavirus 2019 (SARS-COV-2): Immunoinformatics approach.</i> J Med Virol, 2020.                   | EGFNCYFPL               |
| Bhattacharya, M., et al., <i>Development of epitope-based peptide vaccine against novel coronavirus 2019 (SARS-COV-2): Immunoinformatics approach.</i> J Med Virol, 2020.                   | GPKKSTNLV               |
| Bhattacharya, M., et al., <i>Development of epitope-based peptide vaccine against novel coronavirus 2019 (SARS-COV-2): Immunoinformatics approach.</i> J Med Virol, 2020.                   | SPRRARSVA               |
| Bhattacharya, M., et al., <i>Development of epitope-based peptide vaccine against novel coronavirus 2019 (SARS-COV-2): Immunoinformatics approach.</i> J Med Virol, 2020.                   | LGAENSVAY               |
| Bhattacharya, M., et al., <i>Development of epitope-based peptide vaccine against novel coronavirus 2019 (SARS-COV-2): Immunoinformatics approach.</i> J Med Virol, 2020.                   | FKNHTSPDV               |
| Bhattacharya, M., et al., <i>Development of epitope-based peptide vaccine against novel coronavirus 2019 (SARS-COV-2): Immunoinformatics approach.</i> J Med Virol, 2020.                   | DEDDSEPVL               |
| Feng, Y., et al., Multi-epitope vaccine design using an immunoinformatics approach for 2019 novel coronavirus in China (SARS-CoV-2). bioRxiv, 2020.                                         | FIAGLIAIV               |
| Grifoni, A., et al., <i>A Sequence Homology and Bioinformatic Approach Can Predict Candidate Targets for Immune Responses to SARS-CoV-2.</i> Cell Host Microbe, 2020. 27(4): p. 671-680 e2. | IRGWIFGTTLDLSTQSL       |
| Grifoni, A., et al., <i>A Sequence Homology and Bioinformatic Approach Can Predict Candidate Targets for Immune Responses to SARS-CoV-2.</i> Cell Host Microbe, 2020. 27(4): p. 671-680 e2. | CTFEYVSQPFLMD           |
| Grifoni, A., et al., <i>A Sequence Homology and Bioinformatic Approach Can Predict Candidate Targets for Immune Responses to SARS-CoV-2.</i> Cell Host Microbe, 2020. 27(4): p. 671-680 e2. | QPFLMDLEGKQGN           |
| Grifoni, A., et al., <i>A Sequence Homology and Bioinformatic Approach Can Predict Candidate Targets for Immune Responses to SARS-CoV-2.</i> Cell Host Microbe, 2020. 27(4): p. 671-680 e2. | TRFQTLALHRSYLTPGD SSSGW |
| Grifoni, A., et al., <i>A Sequence Homology and Bioinformatic Approach Can Predict Candidate Targets for Immune Responses to SARS-CoV-2.</i> Cell Host Microbe, 2020. 27(4): p. 671-680 e2. | KSFTVEKGIYQTSNFRVQ      |

|                                                                                                                                                                                                                 |                    |
|-----------------------------------------------------------------------------------------------------------------------------------------------------------------------------------------------------------------|--------------------|
| Grifoni, A., et al., <i>A Sequence Homology and Bioinformatic Approach Can Predict Candidate Targets for Immune Responses to SARS-CoV-2</i> . Cell Host Microbe, 2020. <b>27</b> (4): p. 671-680 e2.            | SASFSTFKCYGVSPKTL  |
| Grifoni, A., et al., <i>A Sequence Homology and Bioinformatic Approach Can Predict Candidate Targets for Immune Responses to SARS-CoV-2</i> . Cell Host Microbe, 2020. <b>27</b> (4): p. 671-680 e2.            | KLPDDFTGCV         |
| Grifoni, A., et al., <i>A Sequence Homology and Bioinformatic Approach Can Predict Candidate Targets for Immune Responses to SARS-CoV-2</i> . Cell Host Microbe, 2020. <b>27</b> (4): p. 671-680 e2.            | NLDSKVGGNYNLYRLFR  |
| Grifoni, A., et al., <i>A Sequence Homology and Bioinformatic Approach Can Predict Candidate Targets for Immune Responses to SARS-CoV-2</i> . Cell Host Microbe, 2020. <b>27</b> (4): p. 671-680 e2.            | YLYRLFRKSNLKPFRDI  |
| Grifoni, A., et al., <i>A Sequence Homology and Bioinformatic Approach Can Predict Candidate Targets for Immune Responses to SARS-CoV-2</i> . Cell Host Microbe, 2020. <b>27</b> (4): p. 671-680 e2.            | KPFRDISTEIYQ       |
| Grifoni, A., et al., <i>A Sequence Homology and Bioinformatic Approach Can Predict Candidate Targets for Immune Responses to SARS-CoV-2</i> . Cell Host Microbe, 2020. <b>27</b> (4): p. 671-680 e2.            | QSIAYTMSLGAENSVAY  |
| Grifoni, A., et al., <i>A Sequence Homology and Bioinformatic Approach Can Predict Candidate Targets for Immune Responses to SARS-CoV-2</i> . Cell Host Microbe, 2020. <b>27</b> (4): p. 671-680 e2.            | SIAYTMSL           |
| Grifoni, A., et al., <i>A Sequence Homology and Bioinformatic Approach Can Predict Candidate Targets for Immune Responses to SARS-CoV-2</i> . Cell Host Microbe, 2020. <b>27</b> (4): p. 671-680 e2.            | TECSNLLQYGSFCTQL   |
| Grifoni, A., et al., <i>A Sequence Homology and Bioinformatic Approach Can Predict Candidate Targets for Immune Responses to SARS-CoV-2</i> . Cell Host Microbe, 2020. <b>27</b> (4): p. 671-680 e2.            | VKQIYKTPPIKDFGGFNF |
| Grifoni, A., et al., <i>A Sequence Homology and Bioinformatic Approach Can Predict Candidate Targets for Immune Responses to SARS-CoV-2</i> . Cell Host Microbe, 2020. <b>27</b> (4): p. 671-680 e2.            | DSLSTASALGKLQDVV   |
| Grifoni, A., et al., <i>A Sequence Homology and Bioinformatic Approach Can Predict Candidate Targets for Immune Responses to SARS-CoV-2</i> . Cell Host Microbe, 2020. <b>27</b> (4): p. 671-680 e2.            | ALNTLVKQL          |
| Grifoni, A., et al., <i>A Sequence Homology and Bioinformatic Approach Can Predict Candidate Targets for Immune Responses to SARS-CoV-2</i> . Cell Host Microbe, 2020. <b>27</b> (4): p. 671-680 e2.            | VLNDILSRL          |
| Grifoni, A., et al., <i>A Sequence Homology and Bioinformatic Approach Can Predict Candidate Targets for Immune Responses to SARS-CoV-2</i> . Cell Host Microbe, 2020. <b>27</b> (4): p. 671-680 e2.            | LITGRLQSL          |
| Grifoni, A., et al., <i>A Sequence Homology and Bioinformatic Approach Can Predict Candidate Targets for Immune Responses to SARS-CoV-2</i> . Cell Host Microbe, 2020. <b>27</b> (4): p. 671-680 e2.            | QLIRAAEIRASANLAATK |
| Grifoni, A., et al., <i>A Sequence Homology and Bioinformatic Approach Can Predict Candidate Targets for Immune Responses to SARS-CoV-2</i> . Cell Host Microbe, 2020. <b>27</b> (4): p. 671-680 e2.            | HWFVTQRNFYEPQII    |
| Grifoni, A., et al., <i>A Sequence Homology and Bioinformatic Approach Can Predict Candidate Targets for Immune Responses to SARS-CoV-2</i> . Cell Host Microbe, 2020. <b>27</b> (4): p. 671-680 e2.            | RLNEVAKNL          |
| Grifoni, A., et al., <i>A Sequence Homology and Bioinformatic Approach Can Predict Candidate Targets for Immune Responses to SARS-CoV-2</i> . Cell Host Microbe, 2020. <b>27</b> (4): p. 671-680 e2.            | FIAGLIAIV          |
| Grifoni, A., et al., <i>A Sequence Homology and Bioinformatic Approach Can Predict Candidate Targets for Immune Responses to SARS-CoV-2</i> . Cell Host Microbe, 2020. <b>27</b> (4): p. 671-680 e2.            | NLNESLIDL          |
| Gupta, E., R.K. Mishra, and R.R.K. Niraj, <i>Identification of potential vaccine candidates against SARS-CoV-2, A step forward to fight novel coronavirus 2019-nCoV: A Reverse Vaccinology Approach</i> . 2020. | GVYFASTEK          |
| Gupta, E., R.K. Mishra, and R.R.K. Niraj, <i>Identification of potential vaccine candidates against SARS-CoV-2, A step forward to fight novel coronavirus 2019-nCoV: A Reverse Vaccinology Approach</i> . 2020. | VTYVPAQEK          |
| Gupta, E., R.K. Mishra, and R.R.K. Niraj, <i>Identification of potential vaccine candidates against SARS-CoV-2, A step forward to fight novel coronavirus 2019-nCoV: A Reverse Vaccinology Approach</i> . 2020. | ASANLAATK          |
| Gupta, E., R.K. Mishra, and R.R.K. Niraj, <i>Identification of potential vaccine candidates against SARS-CoV-2, A step forward to fight novel coronavirus 2019-nCoV: A Reverse Vaccinology Approach</i> . 2020. | TLADAGFIK          |
| Gupta, E., R.K. Mishra, and R.R.K. Niraj, <i>Identification of potential vaccine candidates against SARS-CoV-2, A step forward to fight novel coronavirus 2019-nCoV: A Reverse Vaccinology Approach</i> . 2020. | TEILPVSMTK         |
| Gupta, E., R.K. Mishra, and R.R.K. Niraj, <i>Identification of potential vaccine candidates against SARS-CoV-2, A step forward to fight novel coronavirus 2019-nCoV: A Reverse Vaccinology Approach</i> . 2020. | SSTASALGK          |

|                                                                                                                                                                                                                                      |             |
|--------------------------------------------------------------------------------------------------------------------------------------------------------------------------------------------------------------------------------------|-------------|
| Gupta, E., R.K. Mishra, and R.R.K. Niraj, <i>Identification of potential vaccine candidates against SARS-CoV-2, A step forward to fight novel coronavirus 2019-nCoV: A Reverse Vaccinology Approach.</i> 2020.                       | EILPVSMTK   |
| Gupta, E., R.K. Mishra, and R.R.K. Niraj, <i>Identification of potential vaccine candidates against SARS-CoV-2, A step forward to fight novel coronavirus 2019-nCoV: A Reverse Vaccinology Approach.</i> 2020.                       | SNFRVQPTESI |
| Gupta, E., R.K. Mishra, and R.R.K. Niraj, <i>Identification of potential vaccine candidates against SARS-CoV-2, A step forward to fight novel coronavirus 2019-nCoV: A Reverse Vaccinology Approach.</i> 2020.                       | NFRVQPTESIV |
| Gupta, E., R.K. Mishra, and R.R.K. Niraj, <i>Identification of potential vaccine candidates against SARS-CoV-2, A step forward to fight novel coronavirus 2019-nCoV: A Reverse Vaccinology Approach.</i> 2020.                       | LGVYYHKNNKS |
| Gupta, E., R.K. Mishra, and R.R.K. Niraj, <i>Identification of potential vaccine candidates against SARS-CoV-2, A step forward to fight novel coronavirus 2019-nCoV: A Reverse Vaccinology Approach.</i> 2020.                       | GVYYHKNNKSW |
| Gupta, E., R.K. Mishra, and R.R.K. Niraj, <i>Identification of potential vaccine candidates against SARS-CoV-2, A step forward to fight novel coronavirus 2019-nCoV: A Reverse Vaccinology Approach.</i> 2020.                       | LLIVNNATNVV |
| Gupta, E., R.K. Mishra, and R.R.K. Niraj, <i>Identification of potential vaccine candidates against SARS-CoV-2, A step forward to fight novel coronavirus 2019-nCoV: A Reverse Vaccinology Approach.</i> 2020.                       | GVYFASTEK   |
| Gupta, E., R.K. Mishra, and R.R.K. Niraj, <i>Identification of potential vaccine candidates against SARS-CoV-2, A step forward to fight novel coronavirus 2019-nCoV: A Reverse Vaccinology Approach.</i> 2020.                       | VTYVPAQEK   |
| Gupta, E., R.K. Mishra, and R.R.K. Niraj, <i>Identification of potential vaccine candidates against SARS-CoV-2, A step forward to fight novel coronavirus 2019-nCoV: A Reverse Vaccinology Approach.</i> 2020.                       | ASANLAATK   |
| Gupta, E., R.K. Mishra, and R.R.K. Niraj, <i>Identification of potential vaccine candidates against SARS-CoV-2, A step forward to fight novel coronavirus 2019-nCoV: A Reverse Vaccinology Approach.</i> 2020.                       | TLADAGFIK   |
| Gupta, E., R.K. Mishra, and R.R.K. Niraj, <i>Identification of potential vaccine candidates against SARS-CoV-2, A step forward to fight novel coronavirus 2019-nCoV: A Reverse Vaccinology Approach.</i> 2020.                       | TEILPVSMTK  |
| Gupta, E., R.K. Mishra, and R.R.K. Niraj, <i>Identification of potential vaccine candidates against SARS-CoV-2, A step forward to fight novel coronavirus 2019-nCoV: A Reverse Vaccinology Approach.</i> 2020.                       | SSTASALGK   |
| Gupta, E., R.K. Mishra, and R.R.K. Niraj, <i>Identification of potential vaccine candidates against SARS-CoV-2, A step forward to fight novel coronavirus 2019-nCoV: A Reverse Vaccinology Approach.</i> 2020.                       | EILPVSMTK   |
| Gupta, E., R.K. Mishra, and R.R.K. Niraj, <i>Identification of potential vaccine candidates against SARS-CoV-2, A step forward to fight novel coronavirus 2019-nCoV: A Reverse Vaccinology Approach.</i> 2020.                       | NFRVQPTESIV |
| Gupta, E., R.K. Mishra, and R.R.K. Niraj, <i>Identification of potential vaccine candidates against SARS-CoV-2, A step forward to fight novel coronavirus 2019-nCoV: A Reverse Vaccinology Approach.</i> 2020.                       | LLIVNNATNVV |
| Gupta, E., R.K. Mishra, and R.R.K. Niraj, <i>Identification of potential vaccine candidates against SARS-CoV-2, A step forward to fight novel coronavirus 2019-nCoV: A Reverse Vaccinology Approach.</i> 2020.                       | IRASANLAATK |
| Gupta, E., R.K. Mishra, and R.R.K. Niraj, <i>Identification of potential vaccine candidates against SARS-CoV-2, A step forward to fight novel coronavirus 2019-nCoV: A Reverse Vaccinology Approach.</i> 2020.                       | EIRASANLAAT |
| Herst, C.V., et al., <i>An Effective CTL Peptide Vaccine for Ebola Zaire Based on Survivors' CD8+ Targeting of a Particular Nucleocapsid Protein Epitope with Potential Implications for COVID-19 Vaccine Design.</i> bioRxiv, 2020. | LSPRWYFYY   |
| Herst, C.V., et al., <i>An Effective CTL Peptide Vaccine for Ebola Zaire Based on Survivors' CD8+ Targeting of a Particular Nucleocapsid Protein Epitope with Potential Implications for COVID-19 Vaccine Design.</i> bioRxiv, 2020. | KTFPPTEPK   |
| Herst, C.V., et al., <i>An Effective CTL Peptide Vaccine for Ebola Zaire Based on Survivors' CD8+ Targeting of a Particular Nucleocapsid Protein Epitope with Potential Implications for COVID-19 Vaccine Design.</i> bioRxiv, 2020. | KTFPPTEPK   |
| Herst, C.V., et al., <i>An Effective CTL Peptide Vaccine for Ebola Zaire Based on Survivors' CD8+ Targeting of a Particular Nucleocapsid Protein Epitope with Potential Implications for COVID-19 Vaccine Design.</i> bioRxiv, 2020. | IGYYRRATR   |
| Herst, C.V., et al., <i>An Effective CTL Peptide Vaccine for Ebola Zaire Based on Survivors' CD8+ Targeting of a Particular Nucleocapsid Protein Epitope with Potential Implications for COVID-19 Vaccine Design.</i> bioRxiv, 2020. | FPRGQGVPI   |
| Herst, C.V., et al., <i>An Effective CTL Peptide Vaccine for Ebola Zaire Based on Survivors' CD8+ Targeting of a Particular Nucleocapsid Protein Epitope with Potential Implications for COVID-19 Vaccine Design.</i> bioRxiv, 2020. | SPRWYFYLL   |
| Herst, C.V., et al., <i>An Effective CTL Peptide Vaccine for Ebola Zaire Based on Survivors' CD8+ Targeting of a Particular Nucleocapsid Protein Epitope with Potential Implications for COVID-19 Vaccine Design.</i> bioRxiv, 2020. | KAYNVTQAF   |

|                                                                                                                                                                                                                                      |                 |
|--------------------------------------------------------------------------------------------------------------------------------------------------------------------------------------------------------------------------------------|-----------------|
| Herst, C.V., et al., <i>An Effective CTL Peptide Vaccine for Ebola Zaire Based on Survivors' CD8+ Targeting of a Particular Nucleocapsid Protein Epitope with Potential Implications for COVID-19 Vaccine Design.</i> bioRxiv, 2020. | MEVTPSGTW       |
| Herst, C.V., et al., <i>An Effective CTL Peptide Vaccine for Ebola Zaire Based on Survivors' CD8+ Targeting of a Particular Nucleocapsid Protein Epitope with Potential Implications for COVID-19 Vaccine Design.</i> bioRxiv, 2020. | KAYNVTQAF       |
| Herst, C.V., et al., <i>An Effective CTL Peptide Vaccine for Ebola Zaire Based on Survivors' CD8+ Targeting of a Particular Nucleocapsid Protein Epitope with Potential Implications for COVID-19 Vaccine Design.</i> bioRxiv, 2020. | QRNAPRITF       |
| Ismail, S., S. Ahmad, and S.S. Azam, <i>Immuno-informatics Characterization SARS-CoV-2 Spike Glycoprotein for Prioritization of Epitope based Multivalent Peptide Vaccine.</i> bioRxiv, 2020.                                        | YAWNKRKRIS      |
| Ismail, S., S. Ahmad, and S.S. Azam, <i>Immuno-informatics Characterization SARS-CoV-2 Spike Glycoprotein for Prioritization of Epitope based Multivalent Peptide Vaccine.</i> bioRxiv, 2020.                                        | IAPGQTGKI       |
| Ismail, S., S. Ahmad, and S.S. Azam, <i>Immuno-informatics Characterization SARS-CoV-2 Spike Glycoprotein for Prioritization of Epitope based Multivalent Peptide Vaccine.</i> bioRxiv, 2020.                                        | PRRARSVAS       |
| Ismail, S., S. Ahmad, and S.S. Azam, <i>Immuno-informatics Characterization SARS-CoV-2 Spike Glycoprotein for Prioritization of Epitope based Multivalent Peptide Vaccine.</i> bioRxiv, 2020.                                        | TVYDPLQPE       |
| Ismail, S., S. Ahmad, and S.S. Azam, <i>Immuno-informatics Characterization SARS-CoV-2 Spike Glycoprotein for Prioritization of Epitope based Multivalent Peptide Vaccine.</i> bioRxiv, 2020.                                        | VYDPLQPEL       |
| Ismail, S., S. Ahmad, and S.S. Azam, <i>Immuno-informatics Characterization SARS-CoV-2 Spike Glycoprotein for Prioritization of Epitope based Multivalent Peptide Vaccine.</i> bioRxiv, 2020.                                        | FKNHTSPDV       |
| Li, L., et al., <i>Epitope-based peptide vaccine design and target site characterization against novel coronavirus disease caused by SARS-CoV-2.</i> bioRxiv, 2020.                                                                  | IPFAMQMAYR      |
| Li, L., et al., <i>Epitope-based peptide vaccine design and target site characterization against novel coronavirus disease caused by SARS-CoV-2.</i> bioRxiv, 2020.                                                                  | VVFLHVITYV      |
| Li, L., et al., <i>Epitope-based peptide vaccine design and target site characterization against novel coronavirus disease caused by SARS-CoV-2.</i> bioRxiv, 2020.                                                                  | FPNITNLCPF      |
| Li, L., et al., <i>Epitope-based peptide vaccine design and target site characterization against novel coronavirus disease caused by SARS-CoV-2.</i> bioRxiv, 2020.                                                                  | KWPWYIWLGF      |
| Li, L., et al., <i>Epitope-based peptide vaccine design and target site characterization against novel coronavirus disease caused by SARS-CoV-2.</i> bioRxiv, 2020.                                                                  | LPIGINITRF      |
| Li, L., et al., <i>Epitope-based peptide vaccine design and target site characterization against novel coronavirus disease caused by SARS-CoV-2.</i> bioRxiv, 2020.                                                                  | IAIVMVTIM       |
| Li, L., et al., <i>Epitope-based peptide vaccine design and target site characterization against novel coronavirus disease caused by SARS-CoV-2.</i> bioRxiv, 2020.                                                                  | ESNKKFLPF       |
| Li, L., et al., <i>Epitope-based peptide vaccine design and target site characterization against novel coronavirus disease caused by SARS-CoV-2.</i> bioRxiv, 2020.                                                                  | LPFFSNVTW       |
| Li, L., et al., <i>Epitope-based peptide vaccine design and target site characterization against novel coronavirus disease caused by SARS-CoV-2.</i> bioRxiv, 2020.                                                                  | FAMQMAYRF       |
| Li, L., et al., <i>Epitope-based peptide vaccine design and target site characterization against novel coronavirus disease caused by SARS-CoV-2.</i> bioRxiv, 2020.                                                                  | VGYQPYRVVLSFEL  |
| Li, L., et al., <i>Epitope-based peptide vaccine design and target site characterization against novel coronavirus disease caused by SARS-CoV-2.</i> bioRxiv, 2020.                                                                  | FAMQMAYRFNGIGVT |
| Li, L., et al., <i>Epitope-based peptide vaccine design and target site characterization against novel coronavirus disease caused by SARS-CoV-2.</i> bioRxiv, 2020.                                                                  | IPFAMQMAYRFNGIG |
| Li, L., et al., <i>Epitope-based peptide vaccine design and target site characterization against novel coronavirus disease caused by SARS-CoV-2.</i> bioRxiv, 2020.                                                                  | NFTISVTTEILPVSM |
| Li, L., et al., <i>Epitope-based peptide vaccine design and target site characterization against novel coronavirus disease caused by SARS-CoV-2.</i> bioRxiv, 2020.                                                                  | LVLPLVSSQCVNLT  |
| Li, L., et al., <i>Epitope-based peptide vaccine design and target site characterization against novel coronavirus disease caused by SARS-CoV-2.</i> bioRxiv, 2020.                                                                  | VVFLHVITYVPAQEK |

|                                                                                                                                                                                                                                               |                             |
|-----------------------------------------------------------------------------------------------------------------------------------------------------------------------------------------------------------------------------------------------|-----------------------------|
| Li, L., et al., <i>Epitope-based peptide vaccine design and target site characterization against novel coronavirus disease caused by SARS-CoV-2</i> . bioRxiv, 2020.                                                                          | TNFTISVTTEILPVS             |
| Li, L., et al., <i>Epitope-based peptide vaccine design and target site characterization against novel coronavirus disease caused by SARS-CoV-2</i> . bioRxiv, 2020.                                                                          | QYIKWPWYIWLGFIA             |
| Li, L., et al., <i>Epitope-based peptide vaccine design and target site characterization against novel coronavirus disease caused by SARS-CoV-2</i> . bioRxiv, 2020.                                                                          | PTNFTISVTTEILPV             |
| Li, L., et al., <i>Epitope-based peptide vaccine design and target site characterization against novel coronavirus disease caused by SARS-CoV-2</i> . bioRxiv, 2020.                                                                          | GVVFLHVTYVPAQEK             |
| Li, L., et al., <i>Epitope-based peptide vaccine design and target site characterization against novel coronavirus disease caused by SARS-CoV-2</i> . bioRxiv, 2020.                                                                          | GYQPYYRVVLSFELL             |
| Li, L., et al., <i>Epitope-based peptide vaccine design and target site characterization against novel coronavirus disease caused by SARS-CoV-2</i> . bioRxiv, 2020.                                                                          | VFLHVTYVPAQEKNF             |
| Li, L., et al., <i>Epitope-based peptide vaccine design and target site characterization against novel coronavirus disease caused by SARS-CoV-2</i> . bioRxiv, 2020.                                                                          | ALQIPFAMQMAYRFN             |
| Nazneen Akhand, M.R., et al., <i>Genome based Evolutionary study of SARS-CoV-2 towards the Prediction of Epitope Based Chimeric Vaccine</i> . bioRxiv, 2020.                                                                                  | ADYNYKLPD                   |
| Nazneen Akhand, M.R., et al., <i>Genome based Evolutionary study of SARS-CoV-2 towards the Prediction of Epitope Based Chimeric Vaccine</i> . bioRxiv, 2020.                                                                                  | SFVIRGDEVQRQIAPG            |
| Nazneen Akhand, M.R., et al., <i>Genome based Evolutionary study of SARS-CoV-2 towards the Prediction of Epitope Based Chimeric Vaccine</i> . bioRxiv, 2020.                                                                                  | DSFVIRGDEVQRQIAP            |
| Poran, A., et al., <i>Sequence-based prediction of vaccine targets for inducing T cell responses to SARS-CoV-2 utilizing the bioinformatics predictor RECON</i> . bioRxiv, 2020.                                                              | FGADPIHSL                   |
| Poran, A., et al., <i>Sequence-based prediction of vaccine targets for inducing T cell responses to SARS-CoV-2 utilizing the bioinformatics predictor RECON</i> . bioRxiv, 2020.                                                              | SFYEDFLEY                   |
| Poran, A., et al., <i>Sequence-based prediction of vaccine targets for inducing T cell responses to SARS-CoV-2 utilizing the bioinformatics predictor RECON</i> . bioRxiv, 2020.                                                              | QWLPTGTLL                   |
| Poran, A., et al., <i>Sequence-based prediction of vaccine targets for inducing T cell responses to SARS-CoV-2 utilizing the bioinformatics predictor RECON</i> . bioRxiv, 2020.                                                              | LLTKGTLEPEYFNSVCRMLKTIGPD   |
| Poran, A., et al., <i>Sequence-based prediction of vaccine targets for inducing T cell responses to SARS-CoV-2 utilizing the bioinformatics predictor RECON</i> . bioRxiv, 2020.                                                              | GVYDYLVSTQEFYRMYMNSQGLLPPKN |
| Poran, A., et al., <i>Sequence-based prediction of vaccine targets for inducing T cell responses to SARS-CoV-2 utilizing the bioinformatics predictor RECON</i> . bioRxiv, 2020.                                                              | EIDRLNEVAKNLNLSLIDLQELGKY   |
| Poran, A., et al., <i>Sequence-based prediction of vaccine targets for inducing T cell responses to SARS-CoV-2 utilizing the bioinformatics predictor RECON</i> . bioRxiv, 2020.                                                              | TLNGLWLDVVYCPRHVICTSEDML    |
| Ramaiah, A. and V. Arumugaswami, <i>Insights into Cross-species Evolution of Novel Human Coronavirus 2019-nCoV and Defining Immune Determinants for Vaccine Development</i> . bioRxiv, 2020.                                                  | GINITRFQTLALHR              |
| Ramaiah, A. and V. Arumugaswami, <i>Insights into Cross-species Evolution of Novel Human Coronavirus 2019-nCoV and Defining Immune Determinants for Vaccine Development</i> . bioRxiv, 2020.                                                  | INITRFQTLALHRS              |
| Rehman, H.M., et al., <i>A putative prophylactic solution for COVID-19: Development of novel multi-epitope vaccine candidate against SARS - COV - 2 by comprehensive immunoinformatic and molecular modelling approach</i> . Preprints, 2020. | TSNQVAVLY                   |
| Rehman, H.M., et al., <i>A putative prophylactic solution for COVID-19: Development of novel multi-epitope vaccine candidate against SARS - COV - 2 by comprehensive immunoinformatic and molecular modelling approach</i> . Preprints, 2020. | CVADYSVLY                   |
| Rehman, H.M., et al., <i>A putative prophylactic solution for COVID-19: Development of novel multi-epitope vaccine candidate against SARS - COV - 2 by comprehensive immunoinformatic and molecular modelling approach</i> . Preprints, 2020. | KTSVDCTMY                   |
| Rehman, H.M., et al., <i>A putative prophylactic solution for COVID-19: Development of novel multi-epitope vaccine candidate against SARS - COV - 2 by comprehensive immunoinformatic and molecular modelling approach</i> . Preprints, 2020. | VASQSIAY                    |

|                                                                                                                                                                                                                                                             |                  |
|-------------------------------------------------------------------------------------------------------------------------------------------------------------------------------------------------------------------------------------------------------------|------------------|
| Rehman, H.M., et al., <i>A putative prophylactic solution for COVID-19: Development of novel multi-epitope vaccine candidate against SARS - COV - 2 by comprehensive immunoinformatic and molecular modelling approach.</i> Preprints, 2020.                | CNDPFLGVY        |
| Rehman, H.M., et al., <i>A putative prophylactic solution for COVID-19: Development of novel multi-epitope vaccine candidate against SARS - COV - 2 by comprehensive immunoinformatic and molecular modelling approach.</i> Preprints, 2020.                | GAAAYYVGY        |
| Rehman, H.M., et al., <i>A putative prophylactic solution for COVID-19: Development of novel multi-epitope vaccine candidate against SARS - COV - 2 by comprehensive immunoinformatic and molecular modelling approach.</i> Preprints, 2020.                | RISNCVADY        |
| Rehman, H.M., et al., <i>A putative prophylactic solution for COVID-19: Development of novel multi-epitope vaccine candidate against SARS - COV - 2 by comprehensive immunoinformatic and molecular modelling approach.</i> Preprints, 2020.                | ITDAVDCAL        |
| Rehman, H.M., et al., <i>A putative prophylactic solution for COVID-19: Development of novel multi-epitope vaccine candidate against SARS - COV - 2 by comprehensive immunoinformatic and molecular modelling approach.</i> Preprints, 2020.                | MTSCCCLK         |
| Rehman, H.M., et al., <i>A putative prophylactic solution for COVID-19: Development of novel multi-epitope vaccine candidate against SARS - COV - 2 by comprehensive immunoinformatic and molecular modelling approach.</i> Preprints, 2020.                | STQDLFLPF        |
| Rehman, H.M., et al., <i>A putative prophylactic solution for COVID-19: Development of novel multi-epitope vaccine candidate against SARS - COV - 2 by comprehensive immunoinformatic and molecular modelling approach.</i> Preprints, 2020.                | ECSNLLQY         |
| Saha, R. and B.V.L.S. Prasad, <i>In silico approach for designing of a multi-epitope based vaccine against novel Coronavirus(SARS-COV-2).</i> bioRxiv, 2020.                                                                                                | TLDSTQSL         |
| Saha, R. and B.V.L.S. Prasad, <i>In silico approach for designing of a multi-epitope based vaccine against novel Coronavirus(SARS-COV-2).</i> bioRxiv, 2020.                                                                                                | GKQGNFKNL        |
| Saha, R. and B.V.L.S. Prasad, <i>In silico approach for designing of a multi-epitope based vaccine against novel Coronavirus(SARS-COV-2).</i> bioRxiv, 2020.                                                                                                | CYGVSPTKL        |
| Saha, R. and B.V.L.S. Prasad, <i>In silico approach for designing of a multi-epitope based vaccine against novel Coronavirus(SARS-COV-2).</i> bioRxiv, 2020.                                                                                                | KIADYNYKL        |
| Saha, R. and B.V.L.S. Prasad, <i>In silico approach for designing of a multi-epitope based vaccine against novel Coronavirus(SARS-COV-2).</i> bioRxiv, 2020.                                                                                                | VVLSFELL         |
| Saha, R. and B.V.L.S. Prasad, <i>In silico approach for designing of a multi-epitope based vaccine against novel Coronavirus(SARS-COV-2).</i> bioRxiv, 2020.                                                                                                | IGINTRFQ         |
| Saha, R. and B.V.L.S. Prasad, <i>In silico approach for designing of a multi-epitope based vaccine against novel Coronavirus(SARS-COV-2).</i> bioRxiv, 2020.                                                                                                | YGFQPTNGV        |
| Saha, R. and B.V.L.S. Prasad, <i>In silico approach for designing of a multi-epitope based vaccine against novel Coronavirus(SARS-COV-2).</i> bioRxiv, 2020.                                                                                                | VLSFELLHA        |
| Saha, R. and B.V.L.S. Prasad, <i>In silico approach for designing of a multi-epitope based vaccine against novel Coronavirus(SARS-COV-2).</i> bioRxiv, 2020.                                                                                                | LQIPFAMQM        |
| Saha, R. and B.V.L.S. Prasad, <i>In silico approach for designing of a multi-epitope based vaccine against novel Coronavirus(SARS-COV-2).</i> bioRxiv, 2020.                                                                                                | IAIVMVTIM        |
| Sardar, R., et al., <i>Comparative analyses of SAR-CoV2 genomes from different geographical locations and other coronavirus family genomes reveals unique features potentially consequential to host-virus interaction and pathogenesis.</i> bioRxiv, 2020. | LTTRTQLPP        |
| Singh, A., et al., <i>Designing a multi-epitope peptide-based vaccine against SARS-CoV-2.</i> bioRxiv, 2020.                                                                                                                                                | IPFAMQMA YRFNGIG |
| Singh, A., et al., <i>Designing a multi-epitope peptide-based vaccine against SARS-CoV-2.</i> bioRxiv, 2020.                                                                                                                                                | FVFLVLLPLVSSQCW  |
| Singh, A., et al., <i>Designing a multi-epitope peptide-based vaccine against SARS-CoV-2.</i> bioRxiv, 2020.                                                                                                                                                | FAMQMA YRF       |
| Singh, A., et al., <i>Designing a multi-epitope peptide-based vaccine against SARS-CoV-2.</i> bioRxiv, 2020.                                                                                                                                                | FVFLVLLPL        |
| Srivastava, S., et al., <i>Structural basis to design multi-epitope vaccines against Novel Coronavirus 19 (COVID19) infection, the ongoing pandemic emergency: an in silico approach.</i> bioRxiv, 2020.                                                    | KTQSLIVNNATNVV   |
| Srivastava, S., et al., <i>Structural basis to design multi-epitope vaccines against Novel Coronavirus 19 (COVID19) infection, the ongoing pandemic emergency: an in silico approach.</i> bioRxiv, 2020.                                                    | TQSLIVNNATNVVI   |
| Srivastava, S., et al., <i>Structural basis to design multi-epitope vaccines against Novel Coronavirus 19 (COVID19) infection, the ongoing pandemic emergency: an in silico approach.</i> bioRxiv, 2020.                                                    | QSLIVNNATNVVIK   |
| Srivastava, S., et al., <i>Structural basis to design multi-epitope vaccines against Novel Coronavirus 19 (COVID19) infection, the ongoing pandemic emergency: an in silico approach.</i> bioRxiv, 2020.                                                    | SLIVNNATNVVIK    |

|                                                                                                                                                                                                          |                                   |
|----------------------------------------------------------------------------------------------------------------------------------------------------------------------------------------------------------|-----------------------------------|
| Srivastava, S., et al., <i>Structural basis to design multi-epitope vaccines against Novel Coronavirus 19 (COVID19) infection, the ongoing pandemic emergency: an in silico approach.</i> bioRxiv, 2020. | LLIVNNATNVVIVKVC                  |
| Srivastava, S., et al., <i>Structural basis to design multi-epitope vaccines against Novel Coronavirus 19 (COVID19) infection, the ongoing pandemic emergency: an in silico approach.</i> bioRxiv, 2020. | FPNITNLCPF                        |
| Srivastava, S., et al., <i>Structural basis to design multi-epitope vaccines against Novel Coronavirus 19 (COVID19) infection, the ongoing pandemic emergency: an in silico approach.</i> bioRxiv, 2020. | NYLYRLFR                          |
| Srivastava, S., et al., <i>Structural basis to design multi-epitope vaccines against Novel Coronavirus 19 (COVID19) infection, the ongoing pandemic emergency: an in silico approach.</i> bioRxiv, 2020. | NYNYLYRLFR                        |
| Srivastava, S., et al., <i>Structural basis to design multi-epitope vaccines against Novel Coronavirus 19 (COVID19) infection, the ongoing pandemic emergency: an in silico approach.</i> bioRxiv, 2020. | WTAGAAAYYV                        |
| Yarmarkovich, M., et al., <i>A SARS-CoV-2 Vaccination Strategy Focused on Population-Scale Immunity.</i> Cell Reports Medicine, 2020.                                                                    | KVCEFQFCNDPFLGVYYHKNNKSWMESEFRVY  |
| Yarmarkovich, M., et al., <i>A SARS-CoV-2 Vaccination Strategy Focused on Population-Scale Immunity.</i> Cell Reports Medicine, 2020.                                                                    | KPFERDISTEIQAGSTPCNGVEGFNCYFPLQS  |
| Yarmarkovich, M., et al., <i>A SARS-CoV-2 Vaccination Strategy Focused on Population-Scale Immunity.</i> Cell Reports Medicine, 2020.                                                                    | GEVFNATRFASVYAWNRKRISNCVADYSVLYNS |
| Yarmarkovich, M., et al., <i>A SARS-CoV-2 Vaccination Strategy Focused on Population-Scale Immunity.</i> Cell Reports Medicine, 2020.                                                                    | GDSSSGWTAGAAAYYVGYLQPRTFLLKYNENGT |
| Yazdani, Z., et al., <i>Design an efficient multi-epitope peptide vaccine candidate against SARS-CoV-2: An in silico analysis.</i> bioRxiv, 2020.                                                        | QCVNLTTRTQLPPAYTNSFTRGVYYPDKVF    |
| Yazdani, Z., et al., <i>Design an efficient multi-epitope peptide vaccine candidate against SARS-CoV-2: An in silico analysis.</i> bioRxiv, 2020.                                                        | KIADYNYKLPDDFTGCVIAWNSNNLDSKVG    |
| Yazdani, Z., et al., <i>Design an efficient multi-epitope peptide vaccine candidate against SARS-CoV-2: An in silico analysis.</i> bioRxiv, 2020.                                                        | YQPYRVVVLSFELLHAPATVCGPKKSTNLV    |

---



## Reference

- [1]N. Maillet. Rapid Peptides Generator: fast and efficient in silico protein digestion[J]. NAR Genomics and Bioinformatics, 2020, 1,
- [2]A. Blanco-Míguez. Release of potential pro-inflammatory peptides from SARS-CoV-2 spike glycoproteins in neutrophil-extracellular traps[J]. bioRxiv,
- [3]N. M. Andreatta M. Gapped sequence alignment using artificial neural networks: application to the MHC class I system. ): [J]. Bioinformatics, 2016, 511-7. .
- [4]C. V. Herst, S. Burkholz, J. Sidney, A. Sette, P. E. Harris, S. Massey, T. Brasel, E. Cunha-Neto, D. S. Rosa, W. C. H. Chao, R. Carback, T. Hodge, L. Wang, S. Ciotlos, P. Lloyd and R. Rubsamen. An Effective CTL Peptide Vaccine for Ebola Zaire Based on Survivors' CD8+ Targeting of a Particular Nucleocapsid Protein Epitope with Potential Implications for COVID-19 Vaccine Design[J]. bioRxiv, 2020,
- [5]M. C. Jespersen, B. Peters, M. Nielsen and P. Marcatili. BepiPred-2.0: improving sequence-based B-cell epitope prediction using conformational epitopes[J]. Nucleic Acids Res, 2017, W1, W24-W29.
- [6]S. Ismail, S. Ahmad and S. S. Azam. Immuno-informatics Characterization SARS-CoV-2 Spike Glycoprotein for Prioritization of Epitope based Multivalent Peptide Vaccine[J]. bioRxiv, 2020,
- [7]J. V. H. EMILIO A. EMINI, DEBRA S. PERLOW, AND JOSHUA BOGER. Induction of Hepatitis A Virus-Neutralizing Antibody by a VirusSpecific Synthetic Peptide[J]. JOURNAL OF VIROLOGY, 1985,
- [8]P. C. T. A.S.Kolaskar. A semi-empirical method for prediction of antigenic determinants on protein antigens[J]. 1990,
- [9]K. F. Azim, M. Hasan, M. N. Hossain, S. R. Somana, S. F. Hoque, M. N. I. Bappy, A. T. Chowdhury and T. Lasker. Immunoinformatics approaches for designing a novel multi epitope peptide vaccine against human norovirus (Norwalk virus)[J]. Infect Genet Evol, 2019, 103936.
- [10]M. R. Nazneen Akhand, K. F. Azim, S. F. Hoque, M. A. Moli, B. D. Joy, H. Akter, I. K. Afif, N. Ahmed and M. Hasan. Genome based Evolutionary study of SARS-CoV-2 towards the Prediction of Epitope Based Chimeric Vaccine[J]. bioRxiv, 2020,
- [11]J. G. Abelin, D. B. Keskin, S. Sarkizova, C. R. Hartigan, W. Zhang, J. Sidney, J. Stevens, W. Lane, G. L. Zhang, T. M. Eisenhaure, K. R. Clauser, N. Hacohen, M. S. Rooney, S. A. Carr and C. J. Wu. Mass Spectrometry Profiling of HLA-Associated Peptidomes in Mono-allelic Cells Enables More Accurate Epitope Prediction[J]. Immunity, 2017, 2, 315-326.
- [12]A. Poran, D. Harjanto, M. Malloy, M. S. Rooney, L. Srinivasan and R. B. Gaynor. Sequence-based prediction of vaccine targets for inducing T cell responses to SARS-CoV-2 utilizing the bioinformatics predictor RECON[J]. bioRxiv, 2020,
- [13]Y. El-Manzalawy, D. Dobbs and V. Honavar. Predicting linear B-cell epitopes using string kernels[J]. J Mol Recognit, 2008, 4, 243-55.
- [14]K. K. e. a. Jensen. Improved methods for predicting peptide binding affinity to MHC class II molecules. . , [J]. Immunology, 2018, 394-406.

- [15]A. Singh, M. Thakur, L. K. Sharma and K. Chandra. Designing a multi-epitope peptide-based vaccine against SARS-CoV-2[J]. bioRxiv, 2020,
- [16]I. W. D. Simon C. Lovell, W. Bryan Arendall III,Paul I. W. de Bakker, J. Michael Word,Michael G. Prisant,Jane S. Richardson, David C. Richardson. Structure validation by Calpha geometry: phi,psi and Cbeta deviation.[J]. PROTEINS: Structure, Function, and Genetics, 2003,
- [17]S. Srivastava, S. Verma, M. Kamthania, R. Kaur, R. K. Badyal, A. K. Saxena, H.-J. Shin, M. Kolbe and K. C. Pandey. Structural basis to design multi-epitope vaccines against Novel Coronavirus 19 (COVID19) infection, the ongoing pandemic emergency: an in silico approach[J]. bioRxiv, 2020,
- [18]S. Saha and G. P. Raghava. Prediction of continuous B-cell epitopes in an antigen using recurrent neural network[J]. Proteins, 2006, 1, 40-8.
- [19]Y. Vashi, V. Jagrit and S. Kumar. Understanding the B and T cells epitopes of spike protein of severe respiratory syndrome coronavirus-2: A computational way to predict the immunogens[J]. bioRxiv, 2020,
- [20]P. A. Reche, J. P. Glutting, H. Zhang and E. L. Reinherz. Enhancement to the RANKPEP resource for the prediction of peptide binding to MHC molecules using profiles[J]. Immunogenetics, 2004, 6, 405-19.
- [21]J. Sidney, E. Assarsson, C. Moore, S. Ngo, C. Pinilla, A. Sette and B. Peters. Quantitative peptide binding motifs for 19 human and mouse MHC class I molecules derived using positional scanning combinatorial peptide libraries[J]. Immunome Res, 2008, 2.
- [22]Z. Yazdani, A. Rafiei, M. Yazdani and R. Valadan. Design an efficient multi-epitope peptide vaccine candidate against SARS-CoV-2: An in silico analysis[J]. bioRxiv, 2020,
- [23]S. F. Ahmed, A. A. Quadeer and M. R. McKay. Preliminary identification of potential vaccine targets for the COVID-19 coronavirus (SARS-CoV-2) based on SARSCoV immunological studies[J]. Viruses, 2020,
- [24]H. Singh and G. P. Raghava. ProPred1: prediction of promiscuous MHC Class-I binding sites[J]. Bioinformatics, 2003, 8, 1009-14.
- [25]H. S. a. G. P. S. Raghava. ProPred: prediction ofHLA-DR binding sites[J]. Bioinformatics, 2001,
- [26]M. Behbahani. In silico Design of novel Multi-epitope recombinant Vaccine based on Coronavirus surface glycoprotein[J]. bioRxiv, 2020,
- [27]M. Bhattacharya, A. R. Sharma, P. Patra, P. Ghosh, G. Sharma, B. C. Patra, S. S. Lee and C. Chakraborty. Development of epitope-based peptide vaccine against novel coronavirus 2019 (SARS-COV-2): Immunoinformatics approach[J]. J Med Virol, 2020,
- [28]J. V. Kringelum, C. Lundegaard, O. Lund and M. Nielsen. Reliable B cell epitope predictions: impacts of method development and improved benchmarking[J]. PLoS Comput Biol, 2012, 12, e1002829.
- [29]B. Chen, M. S. Khodadoust, N. Olsson, L. E. Wagar, E. Fast, C. L. Liu, Y. Muftuoglu, B. J. Sworder, M. Diehn, R. Levy, M. M. Davis, J. E. Elias, R. B. Altman and A. A. Alizadeh. Predicting HLA class II antigen presentation through integrated deep learning[J]. Nat Biotechnol, 2019, 11, 1332-1343.
- [30]E. Fast, R. B. Altman and B. Chen. Potential T-cell and B-cell Epitopes of 2019-nCoV[J]. bioRxiv, 2020,
- [31]Y. Feng, M. Qiu, S. Zou, Y. Li, K. Luo, R. Chen, Y. Sun, K. Wang, X. Zhuang, S. Zhang, S. Chen and F. Mo. Multi-epitope vaccine design using an immunoinformatics

approach for 2019 novel coronavirus in China (SARS-CoV-2)[J]. *bioRxiv*, 2020,

[32]A. Grifoni, J. Sidney, Y. Zhang, R. H. Scheuermann, B. Peters and A. Sette. A Sequence Homology and Bioinformatic Approach Can Predict Candidate Targets for Immune Responses to SARS-CoV-2[J]. *Cell Host Microbe*, 2020, 4, 671-680 e2.

[33]M. S. Rahman, M. N. Hoque, M. R. Islam, S. Akter, A. S. M. Rubayet-UI-Alam, M. A. Siddique, O. Saha, M. M. Rahaman, M. Sultana and M. A. Hossain. Epitope-based chimeric peptide vaccine design against S, M and E proteins of SARS-CoV-2 etiologic agent of global pandemic COVID-19: an in silico approach[J]. *bioRxiv*, 2020,

[34]A. Ramaiah and V. Arumugaswami. Insights into Cross-species Evolution of Novel Human Coronavirus 2019-nCoV and Defining Immune Determinants for Vaccine Development.[J]. *bioRxiv*, 2020,

[35]I. W. Davis, A. Leaver-Fay, V. B. Chen, J. N. Block, G. J. Kapral, X. Wang, L. W. Murray, W. B. Arendall, 3rd, J. Snoeyink, J. S. Richardson and D. C. Richardson. MolProbity: all-atom contacts and structure validation for proteins and nucleic acids[J]. *Nucleic Acids Res*, 2007, Web Server issue, W375-83.

[36]H. M. Rehman, M. U. Mirza, M. Saleem, M. Froeyen, S. Ahmad, R. Gul, M. S. Aslam, M. Sajjad and M. A. Bhinder. A putative prophylactic solution for COVID-19: Development of novel multiepitope vaccine candidate against SARS - COV - 2 by comprehensive immunoinformatic and molecular modelling approach[J]. *Preprints*, 2020,

[37]C. K. H. Pingping Guan, Irini A. Doytchinova and Darren R. Flower. MHCpred 2.0 An Updated Quantitative T-Cell Epitope Prediction Server[J]. *Appl. Bioinformatics*, 2006,

[38]R. Saha and B. V. L. S. Prasad. In silico approach for designing of a multi-epitope based vaccine against novel Coronavirus(SARS-COV-2)[J]. *bioRxiv*, 2020,

[39]R. G. Bhasin M. Prediction of CTL epitopes using QM, SVM and ANN techniques.[J]. *Vaccines (Basel)*, 2004, 3195-204.

[40]D. Satish, S. K. Mukherjee and D. Gupta. PAMiRDB: A web resource for plant miRNAs targeting viruses[J]. *Sci Rep*, 2019, 1, 4627.

[41]D. Betel, M. Wilson, A. Gabow, D. S. Marks and C. Sander. The microRNA.org resource: targets and expression[J]. *Nucleic Acids Res*, 2008, Database issue, D149-53.

[42]X. Dai and P. X. Zhao. psRNATarget: a plant small RNA target analysis server[J]. *Nucleic Acids Res*, 2011, Web Server issue, W155-9.

[43]R. Sardar, D. Satish, S. Birla and D. Gupta. Comparative analyses of SAR-CoV2 genomes from different geographical locations and other coronavirus family genomes reveals unique features potentially consequential to host-virus interaction and pathogenesis[J]. *bioRxiv*, 2020,

[44]M. Yarmarkovich, J. M. Warrington, A. Farrel and J. M. Maris. A SARS-CoV-2 Vaccination Strategy Focused on Population-Scale Immunity[J]. *Cell Reports Medicine*, 2020,

[45]S. a. G. P. S. R. Saha. BcePred: Prediction of Continuous B-Cell Epitopes in Antigenic Sequences Using Physico-chemical Properties. Berlin, Heidelberg: Springer Berlin Heidelberg[J]. *Artificial Immune Systems*, 2004., 197-204.

[46]L. Li, T. Sun, Y. He, W. Li, Y. Fan and J. Zhang. Epitope-based peptide vaccine design and target site characterization against novel coronavirus disease caused by SARS-CoV-2[J]. 2020,
